# Supplementary figures and images for: Dna2 nuclease-helicase structure, mechanism and regulation by Rpa
Source: eLife journal article supplement (doi:10.7554/elife.09832), 2015-10-22

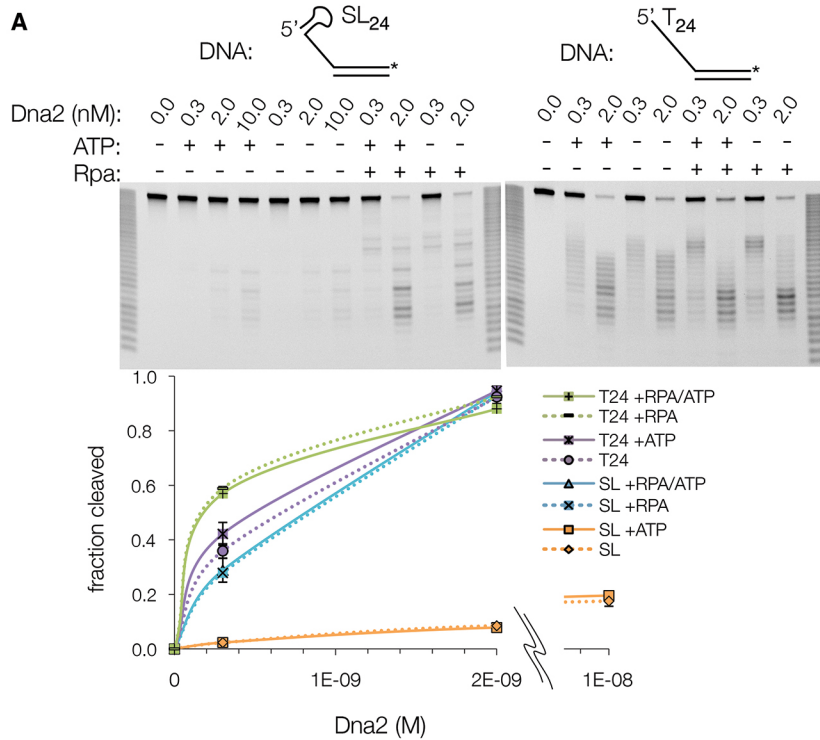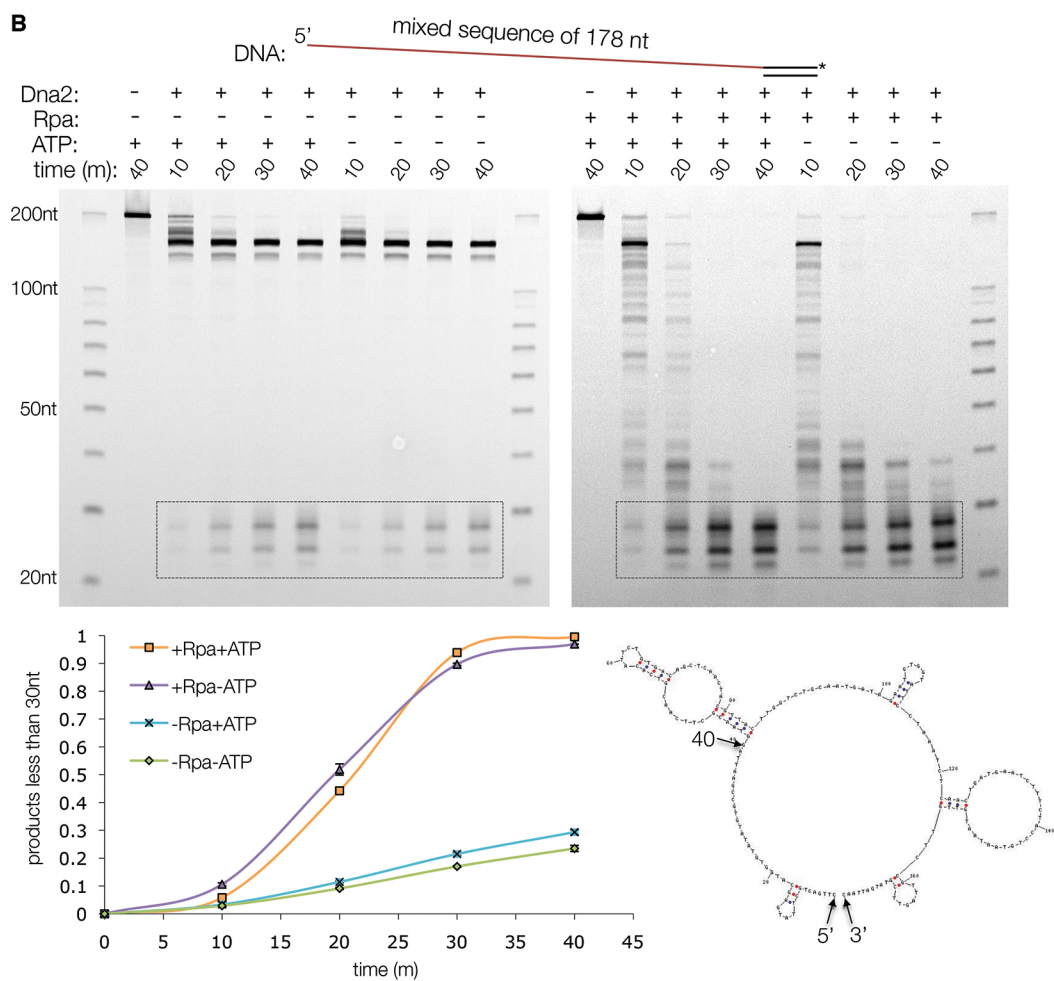

Supplement: supp [file elife-09832-supp-v1.zip]

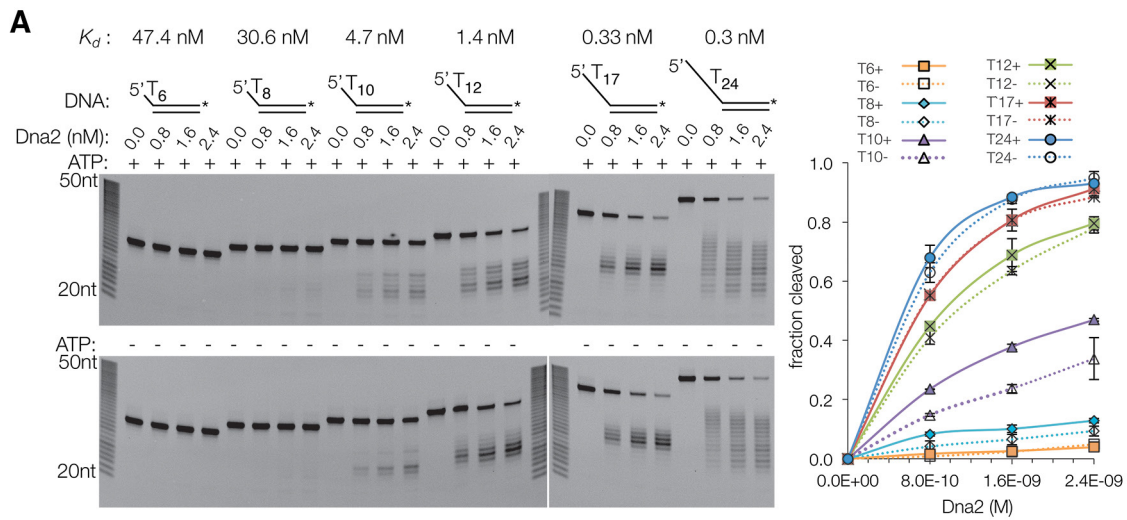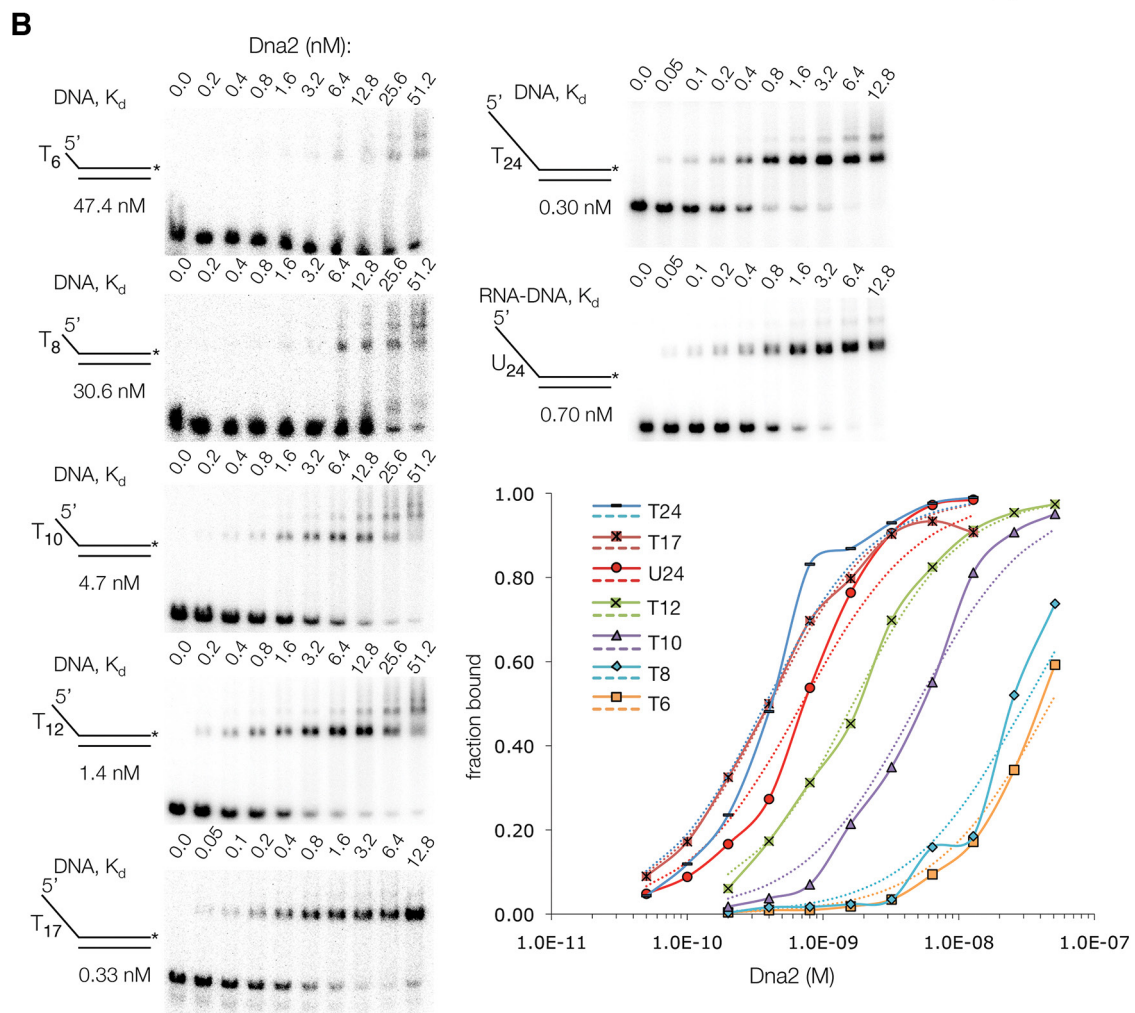

Supplement: supp [file elife-09832-supp-v1.zip]

**A**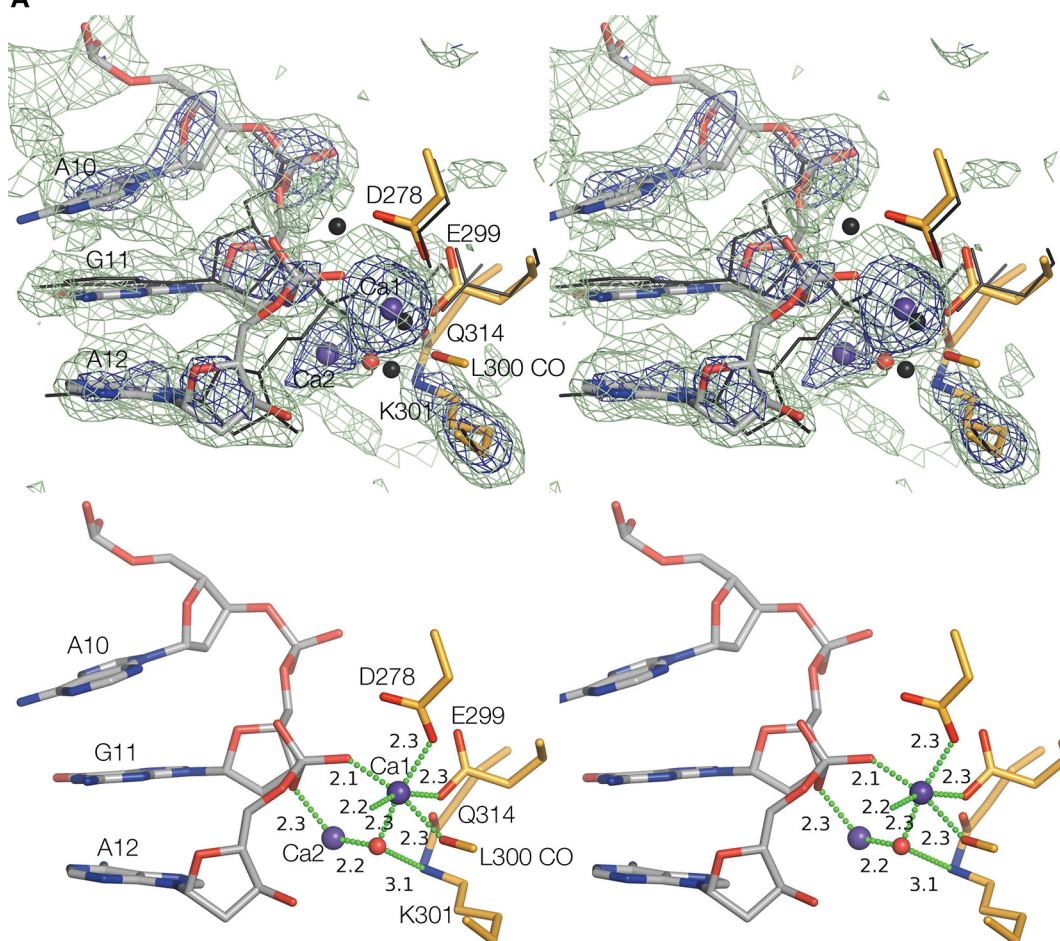**B**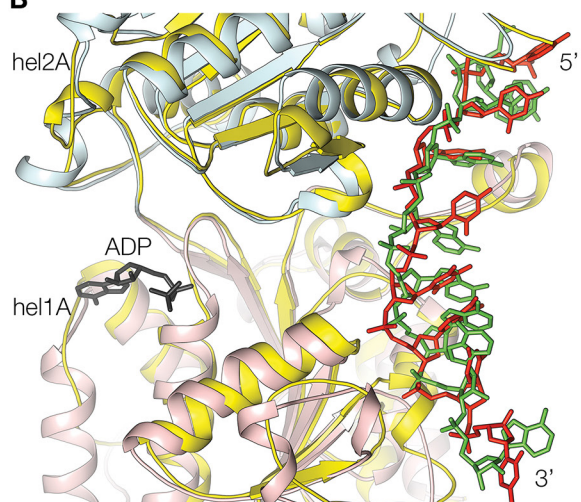**C**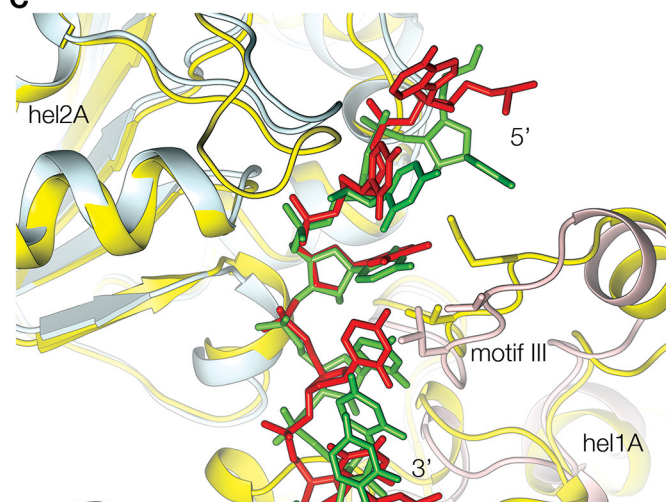

Supplement: supp [file elife-09832-supp-v1.zip]

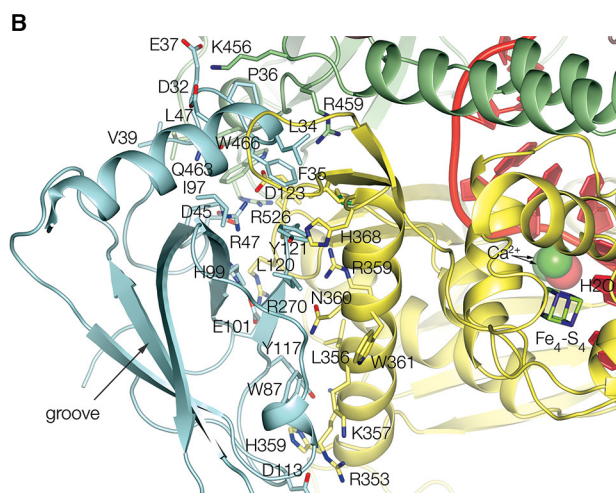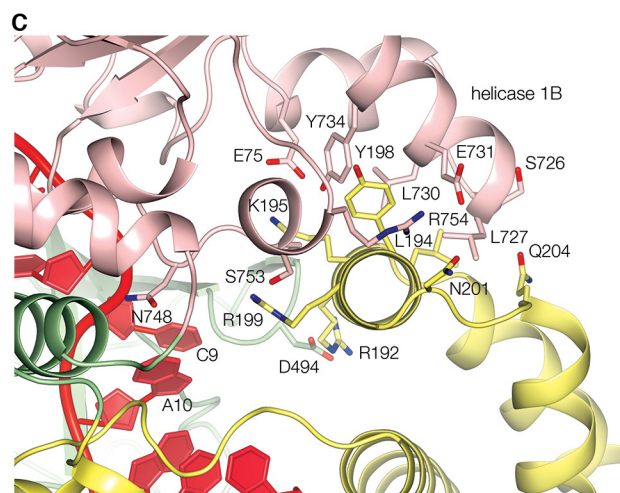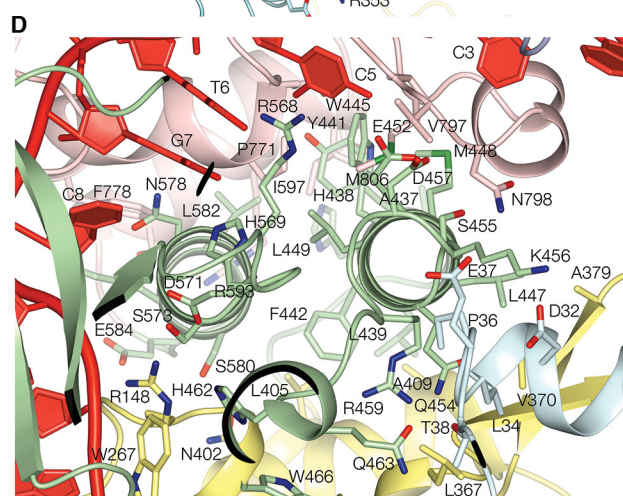

Supplement: supp [file elife-09832-supp-v1.zip]

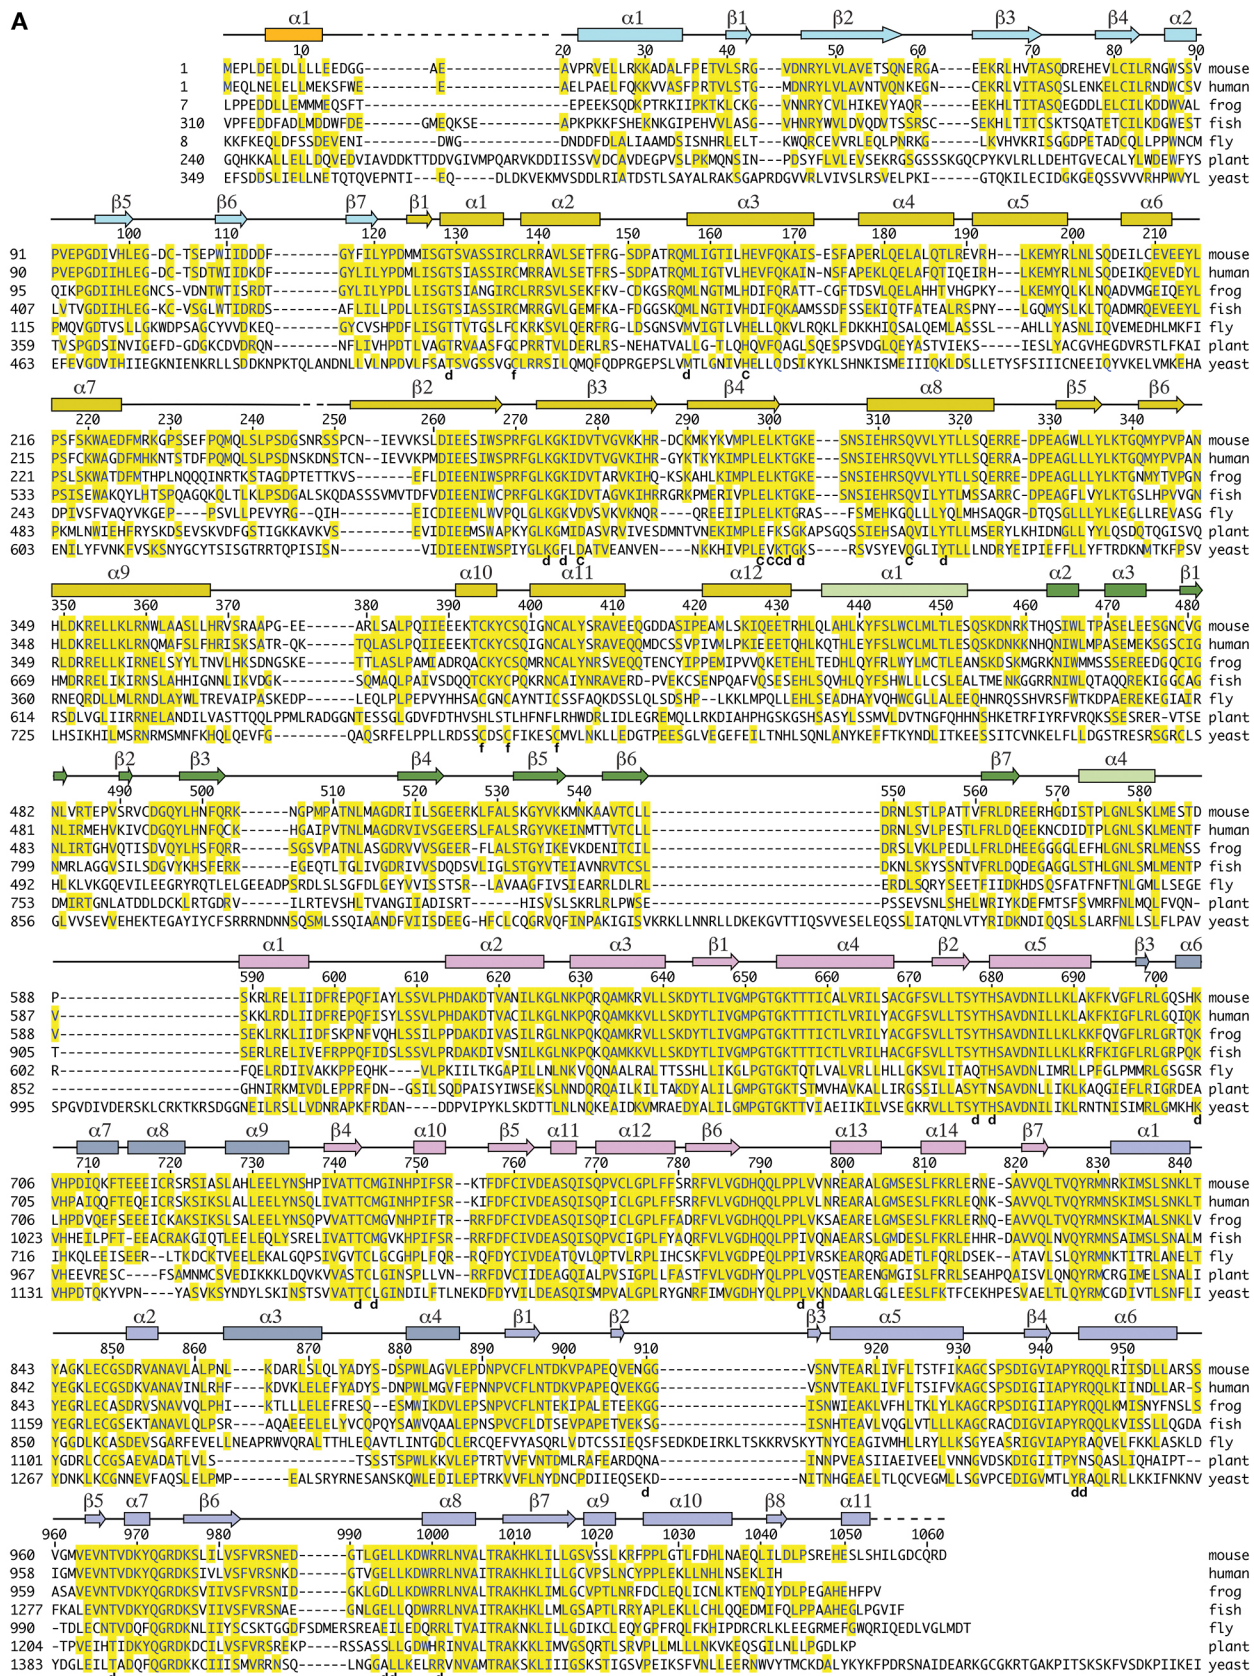

Supplement: supp [file elife-09832-supp-v1.zip]
